# Supplementary material for: Cross-education does not improve early and late-phase rehabilitation outcomes after ACL reconstruction: a randomized controlled clinical trial
Source: Springer Nature journal article supplement (doi:10.1007/s00167-018-5116-y), 2018-09-04
Supplement: MOESM3 [file 16096656]

Online Resource 3. Self-reported knee function and the limb symmetry indices for maximal quadriceps torques, maximal hamstring torques, and single leg hop distance. Mean (SD) of each group, mean (SD) difference within each group, and mean (95% CI) difference between groups.

| Outcome | Injured leg | | | | | | | | | | |
| --- | --- | --- | --- | --- | --- | --- | --- | --- | --- | --- | --- |
|  | Pre-surgery | |  | Week 5 post-surgery | |  | Week 12 post-surgery | |  | Week 26 post-surgery | |
|  | ND (n = 16) | D (n = 27) |  | ND (n = 16) | D (n = 27) |  | ND (n = 16) | D (n = 27) |  | ND (n = 16) | D (n = 27) |
| HCK score (%) | 32 (13) | 33 (13) |  | 50 (13) | 42 (13) |  | 32 (13) | 29 (13) |  | 20 (13) | 16 (14) |
| LSI quadriceps torques (%) |  |  |  |  |  |  |  |  |  |  |  |
| Eccentric 60°/s | 89 (21) | 91 (20) |  | - | - |  | - | - |  | 71 (21) | 80 (20) |
| Isometric | 86 (14) | 89 (14) |  | 51 (14) | 54 (14) |  | 68 (14) | 69 (14) |  | 81 (14) | 86 (14) |
| Concentric 60°/s | 83 (17) | 88 (17) |  | - | - |  | 64 (17) | 65 (17) |  | 77 (17) | 82 (18) |
| Concentric 120°/s | 83 (17) | 93 (17) |  | - | - |  | 68 (16) | 73 (17) |  | 81 (17) | 85 (17) |
| Concentric 180°/s | 86 (14) | 89 (14) |  | - | - |  | 71 (13) | 77 (14) |  | 82 (14) | 89 (14) |
| LSI hamstring torques (%) |  |  |  |  |  |  |  |  |  |  |  |
| Eccentric 60°/s | 83 (16) | 90 (15) |  | - | - |  | - | - |  | 82 (16) | 86 (15) |
| Isometric | 89 (16) | 94 (17) |  | 51 (16) | 57 (16) |  | 68 (16) | 72 (17) |  | 77 (17) | 82 (17) |
| Concentric 60°/s | 85 (16) | 97 (15) |  | - | - |  | 71 (16) | 80 (16) |  | 80 (16) | 91 (16) |
| Concentric 120°/s | 90 (17) | 101 (17) |  | - | - |  | 79 (17) | 84 (17) |  | 85 (17) | 92 (17) |
| Concentric 180°/s | 97 (20) | 101 (19) |  | - | - |  | 82 (20) | 88 (20) |  | 89 (20) | 94 (19) |
| LSI single leg hop test (%) | 83 (16) | 86 (17) |  | - | - |  | - | - |  | 87 (17) | 84 (18) |

Online Resource 3. *(Continued)*.

| Outcome | Difference within legs | | | | | | | |  | Difference between legs | | | | |
| --- | --- | --- | --- | --- | --- | --- | --- | --- | --- | --- | --- | --- | --- | --- |
|  | Week 5 minus  pre-surgery | |  | Week 12 minus  pre-surgery | |  | Week 26 minus pre-surgery | |  | Week 5 minus pre-surgery |  | Week 12 minus pre-surgery |  | Week 26 minus pre-surgery |
|  | ND | D |  | ND | D |  | ND | D |  | ND-D |  | ND-D |  | ND-D |
| HCK score (%) | -18 (10)† | -9 (14) |  | 0 (10) | 4 (14) |  | 12 (10)† | 16 (14) |  | 9 (1 to 17) |  | 3 (-4 to 11) |  | 5 (-3 to 13) |
| LSI quadriceps torques (%) |  |  |  |  |  |  |  |  |  |  |  |  |  |  |
| Eccentric 60°/s | - | - |  | - | - |  | 18 (16)† | 11 (24)† |  | - |  | - |  | -8 (-22 to 7) |
| Isometric | 36 (13)† | 36 (14)† |  | 18 (13)† | 20 (14)† |  | 5 (14) | 3 (14) |  | 0 (-8 to 8) |  | 2 (-6 to 10) |  | -2 (-11 to 7) |
| Concentric 60°/s | - | - |  | 19 (12)† | 23 (22)† |  | 6 (12) | 6 (22) |  | - |  | 4 (-8 to 16) |  | 0 (-12 to 12) |
| Concentric 120°/s | - | - |  | 15 (14)† | 20 (25)† |  | 2 (14) | 8 (26) |  | - |  | 5 (-9 to 18) |  | 6 (-8 to 20) |
| Concentric 180°/s | - | - |  | 15 (11)† | 11 (18)† |  | 4 (12) | 0 (18) |  | - |  | -4 (-14 to 6) |  | -4 (-14 to 6) |
| LSI hamstring torques (%) |  |  |  |  |  |  |  |  |  |  |  |  |  |  |
| Eccentric 60°/s | - | - |  | - | - |  | 2 (16) | 4 (18) |  | - |  | - |  | 3 (-8 to 14) |
| Isometric | 38 (23)† | 36 (19)† |  | 21 (24)† | 21 (20)† |  | 12 (24) | 11 (20)† |  | -2 (-14 to 10) |  | 0 (-12 to 12) |  | -1 (-13 to 11) |
| Concentric 60°/s | - | - |  | 14 (22)† | 17 (18)† |  | 5 (22) | 5 (18)† |  | - |  | 2 (-9 to 15) |  | 0 (-12 to 12) |
| Concentric 120°/s | - | - |  | 10 (18) | 17 (23)† |  | 4 (18) | 9 (23) |  | - |  | 7 (-7 to 20) |  | 4 (-9 to 18) |
| Concentric 180°/s | - | - |  | 20 (26)† | 9 (27) |  | 12 (26) | 3 (27) |  | - |  | -10 (-27 to 7) |  | -9 (-26 to 8) |
| LSI single leg hop test (%) | - | - |  | - | - |  | -4 (27) | 1 (24) |  | - |  | - |  | 6 (-5 to 18) |

ND = non-dominant, D = dominant, HCK = Hughston Clinic Knee, LSI = limb symmetry index, † = different compared to pre-surgery (*p < 0.05).*
